# Supplementary material for: Lethal photosensitisation of Staphylococcus aureus and Escherichia coli using crystal violet and zinc oxide-encapsulated polyurethane
Source: Royal Society of Chemistry journal article supplement (doi:10.1039/c5tb00971e), 2015-01-01
Supplement: c5tb00971e1.pdf [file c5tb00971e1.pdf]

## Lethal photosensitisation of *Staphylococcus aureus* and *Escherichia coli* using crystal violet and zinc oxide-encapsulated polyurethane

Sandeep K. Sehmi,<sup>a,b,c</sup> Sacha Noimark,<sup>a</sup> Joseph C. Bear,<sup>a</sup> William J. Peveler,<sup>a</sup> Melissa Bovis,<sup>b</sup> Elaine Allan,<sup>c</sup> Alexander J. MacRobert<sup>b</sup> and Ivan P. Parkin\*

<sup>a</sup>Materials Chemistry Research Centre, Department of Chemistry, University College London, 20 Gordon Street, London, WC1H 0AJ, UK. E-mail: i.p.parkin@ucl.ac.uk

<sup>b</sup>UCL Division of Surgery and Interventional Science,

67-73 Riding House Street, London, W1 W7EJ, UK. Email: a.macrobot@ucl.ac.uk

<sup>c</sup>Department of Microbial Diseases, UCL Eastman Dental Institute, University College London, 256 Gray's Inn Road, London, WC1X 8LD, UK

### Supplementary Information

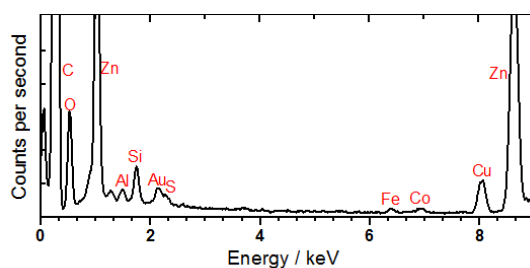

Figure S1 EDX spectrum of ZnO.

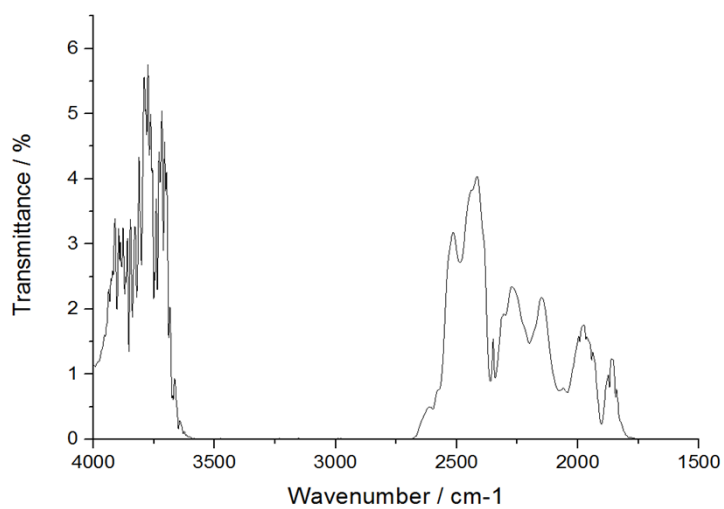

**Figure S2** ATR spectrum of solvent treated polyurethane (control).

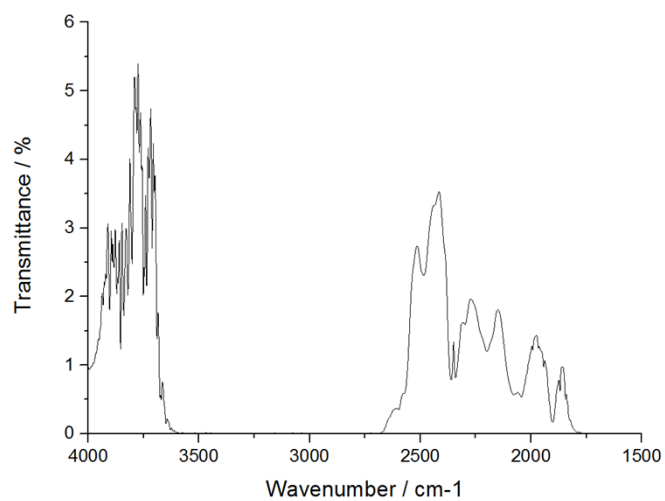

**Figure S3** ATR spectrum of ZnO-encapsulated polyurethane (ZnO).

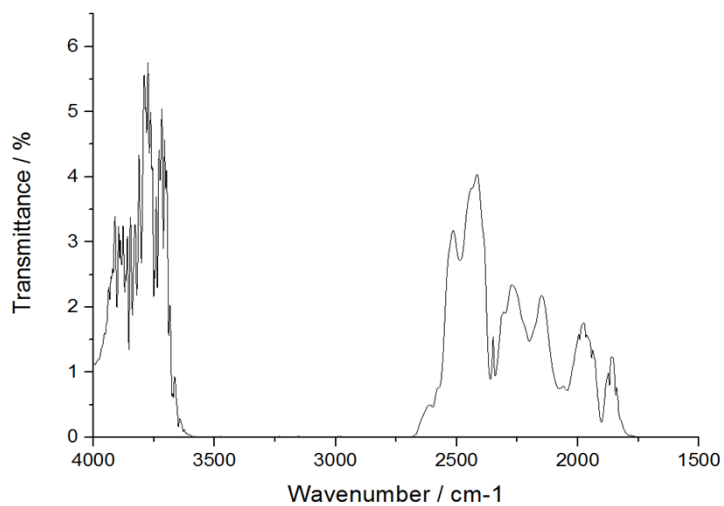

**Figure S4** ATR spectrum of CV-coated polyurethane (CV).

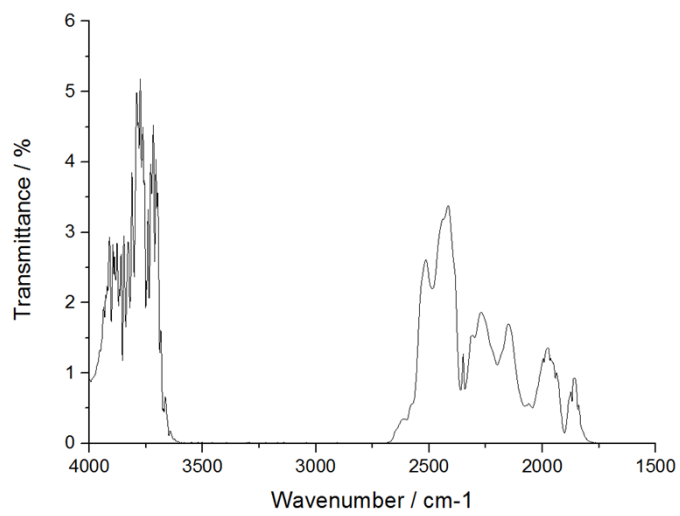

**Figure S5** ATR spectrum of CV and ZnO-encapsulated polyurethane (CVZnO).
